# Supplementary material for: CRISPR/Cas9 based blockade of IL-10 signaling impairs lipid and tissue homeostasis to accelerate atherosclerosis
Source: PubMed Central journal article supplement (PMC9469689; doi:10.3389/fimmu.2022.999470), 2022-08-30
Supplement: DataSheet_1.pdf [file DataSheet_1.pdf]

## Supplementary figure legends

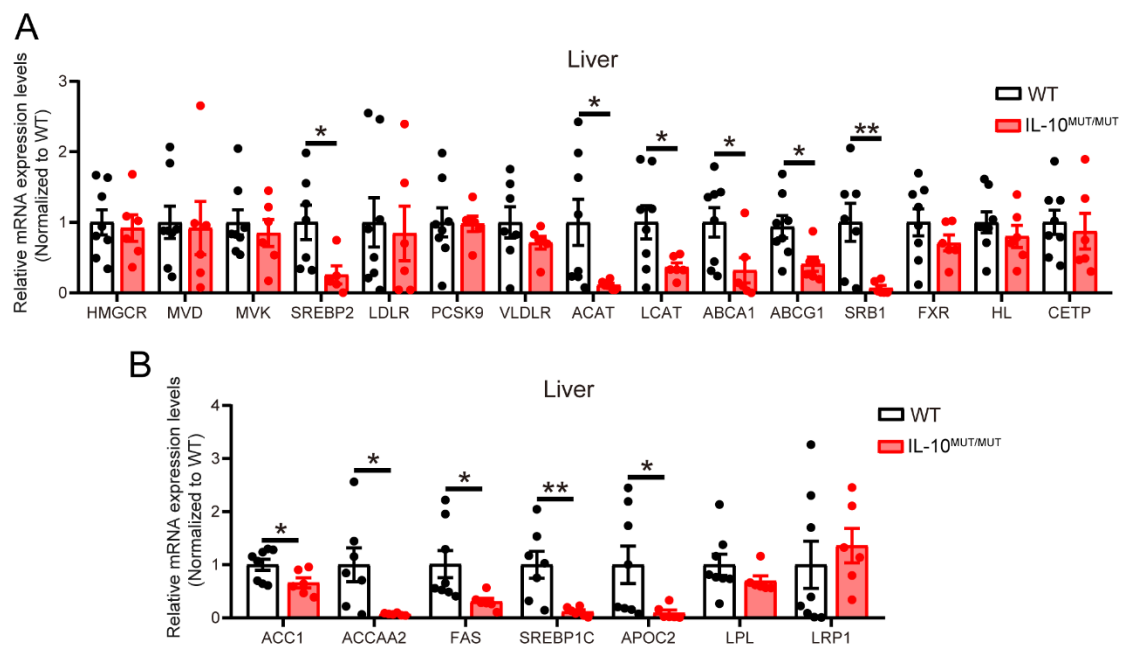

**Figure S1. Chow diet-fed IL10<sup>MUT/MUT</sup> hamsters showed abnormal fatty acid and cholesterol metabolism in liver.**

A: Expression levels of genes involved in cholesterol metabolism were determined by real-time PCR (n=6 ~ 8/group).

B: Expression levels of genes involved in fatty acid metabolism were determined by real-time PCR (n=6 ~ 8/group).

All data were expressed as means  $\pm$  SEM, \*, p<0.05; \*\*, p<0.01.

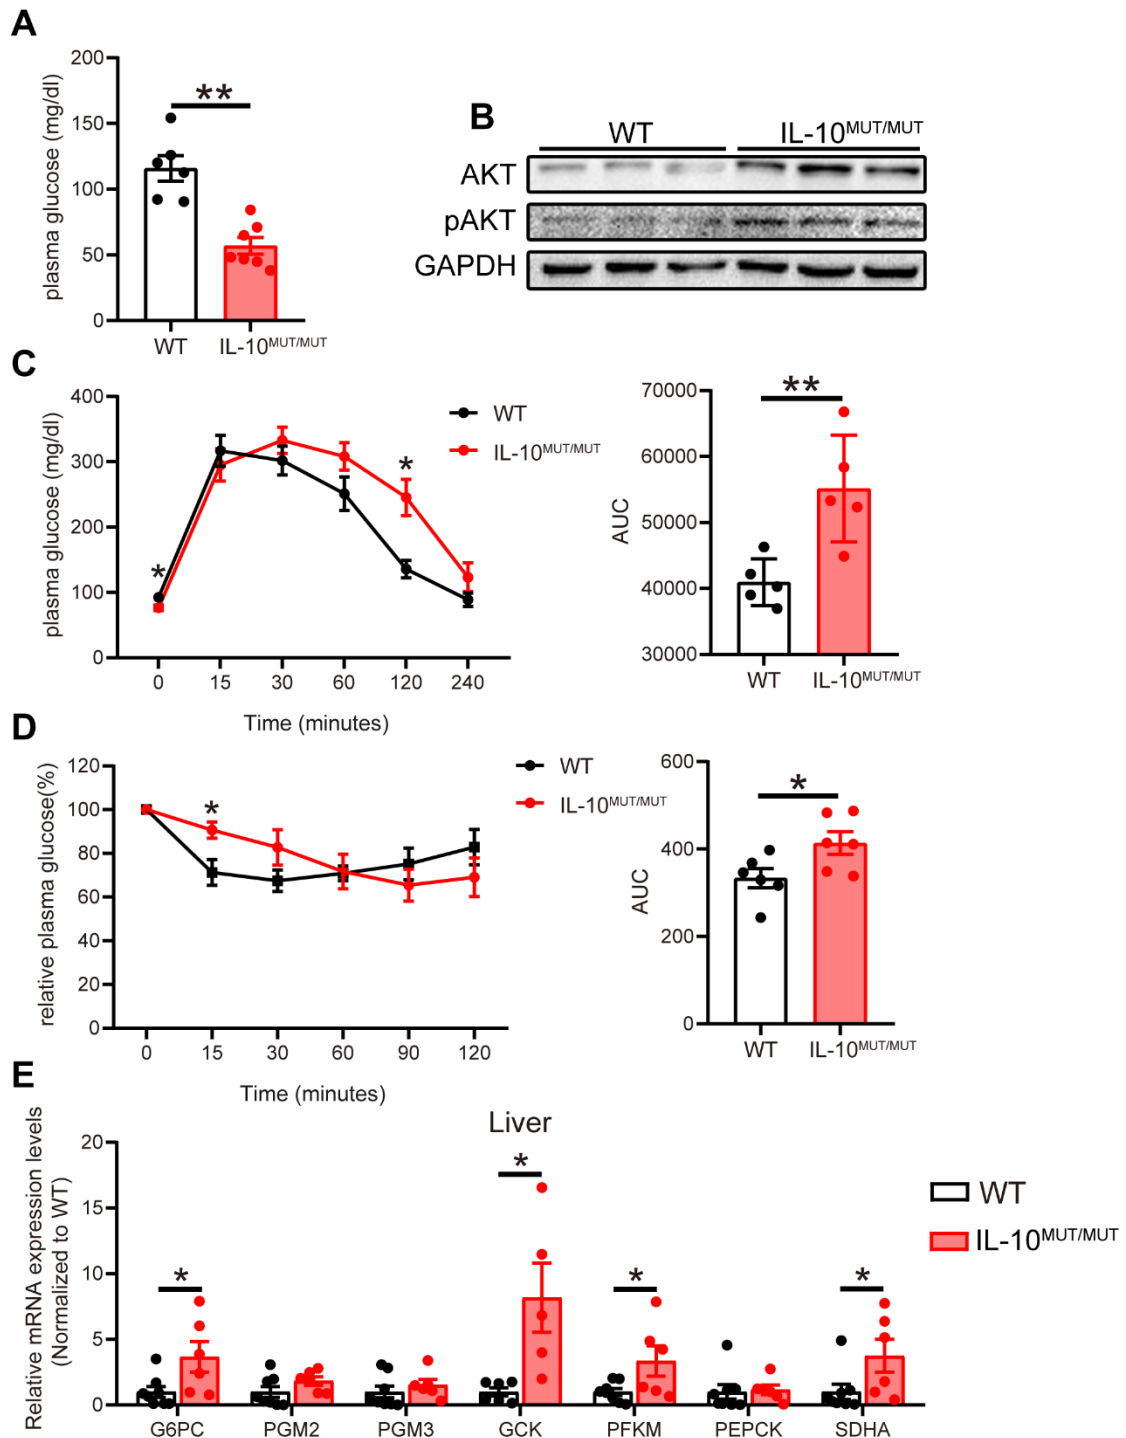

**Figure S2. Chow diet-fed IL10<sup>MUT/MUT</sup> hamsters showed abnormal glucose metabolism.**

A: Blood glucose levels were determined from WT and IL10<sup>MUT/MUT</sup> hamsters on CD (n=6~7/group).

B: Representative Western blot of hepatic AKT and pAKT from WT and IL10<sup>MUT/MUT</sup> hamsters.

C, D: GTT (C) and ITT (D) was performed on WT and IL10<sup>MUT/MUT</sup> hamsters fed CD. Plasma glucose curves were shown in left panel and quantification by AUC was shown in right panel (n=5~6/group).

E: Expression levels of genes regulating gluconeogenesis in liver were determined by real-time PCR (n=5~7/group).

All data were expressed as means  $\pm$  SEM, \*,  $p < 0.05$ ; \*\*,  $p < 0.01$ .

| LOCUS          | gene name | primer sequence                                      |
|----------------|-----------|------------------------------------------------------|
| NW_024429191.1 | Igfbp4    | F: GGGCTGTAGAGTTGACCTGA<br>R: TCTTCCACACAAAGCTCCCTC  |
| NW_024429203.1 | Atm       | F: ACTCAGGGGTTAGGAGATACT<br>R: TCTGCGTGATGTAGACTGCT  |
| NW_024429195.1 | Agap2     | F: GTTGAGGAGTTCTGGGGCAC<br>R: GTAGTAATGCCCCCTCCACG   |
| NW_024429184.1 | Rab27b    | F: GAGTGCCTGTGAAGGAGACC<br>R: CCCTGTTGCCTGAAGACCAA   |
| NW_024429266.1 | B3galt2   | F: GGGAGGAAAAGGGATACAGGT<br>R: TGGGGCCAAACAAAACATGAG |

**Table. S1 The list of potential off-target genes and the PCR primers for analysis in founder.**

| Gene          | Forward                | Reverse                |
|---------------|------------------------|------------------------|
| Beta actin    | ACTGCCGCATCCTCTTCCT    | TCGTTGCCAATGGTGATGAC   |
| IL-10         | ACCTGGTAGAAGTGATGCC    | AGTTGCCTCCTGAGGGTCTT   |
| IL-10RA       | CCCAGGGCTACCAGAAACAG   | GACCCTTGATTCTGGGGGTG   |
| IL-10RB       | TCAACGAAGAGACCGAAGGC   | CGAGGCCGACGTAAGAAGTA   |
| STAT1         | GGACGGCAAAGTCAGAAACG   | TGTCTTCGCTTCCACTCCAC   |
| STAT3         | GCCAAATGCATGGGCATCAA   | TTGGTCCCAGGTTCCAATCG   |
| JAK1          | GTACGCTCCGAACCACATCA   | CCGCCATACAGACTGCTCAT   |
| TYK2          | GCCCTGGTGGATGGCTATTT   | GGATGCCGTTCTGGATGCTA   |
| IL-1 $\beta$  | AGTCATTGTGGCTGTGGAGA   | TGTTGTTTTCATCTCGGAGCCT |
| IL-6          | CAACCCTGGCTGTATGGACA   | GTGCTCTGAATGACTCTGGCT  |
| NF $\kappa$ B | ATGAAGACTTGGGGGCCTTG   | CTGTGGGGGTGAGACATGGAC  |
| TNF $\alpha$  | TCCTGGCCTCCTTTTTGCTT   | CCCGTAGGGCGATTACAGTC   |
| UCP-1         | TTAATGACCGGAGGTGTGGC   | CCTCAACAGGTTAGGGGTGCG  |
| CIDEA         | GGACAGTTCCTGGTCTACGC   | AAAGGAATGCACCTGGGCTC   |
| COX8B         | AGTTCCCCAGGCGGCTATAA   | AGGTTGTGCTCCTTCCTTGG   |
| PGC1A         | TGAATGCAGCGGTCTTAGCA   | TTGGAGGCGCATTGTCTCT    |
| BAX           | GGCCTTTTTGCTACAGGGTTTC | TCATCTCCGATTGCCTGAG    |
| BCL2          | AAATCGCCGAGAAGAAGCGA   | GTTCCACGGTTTGGCTTCAC   |
| MLKL          | TGAAGATTGCCCAAGCTGT    | TCCAGTTTGTTCGCTTCCA    |
| MYD88         | ATTGAGAAGAGGTGTCGCCG   | GATGGTGATGAACCGCAGGA   |
| TLR4          | GCTGAAGCAACAAGTGGAGC   | GGCTCTCCGTCCAACAGAG    |
| LBP           | ATCTGGGTCCGAGGCAAATG   | GGAGCTTGGACTCGATCTGG   |
| CD14          | TCCCGGCTCTCCAAGTTCTA   | CGGTATGCCGCAGTGAATTG   |
| ABHD5         | CGGATAGGAGACTTGCACCC   | TCACGTAGGACTTTGGTCGC   |
| ATSL          | AAGGAGTGCGCTATGTGGAC   | GATTGCGCAGGTTGAACTGG   |
| HSL           | GTTGTCGTCCCTGGCTAACA   | TTCCCGCAGGTCATAGGAGA   |
| PLIN1         | CCCAGCCCTTCAATACCCTC   | TGGTGTGCCGAGAAAGAGTG   |
| LRP1          | TGTACGCCACCAACTCAGAC   | CTTCTTGCAGGACTTCCCGT   |

|              |                         |                              |
|--------------|-------------------------|------------------------------|
| SHC1         | TGGTTCGAGAGAGCACAACC    | CCTTTGTCCGAACCACACCT         |
| LXR $\alpha$ | GTCCACAAAAGCGGAAAAAG    | CTCGCAGCTCAGAACAATGTA        |
| ABCA1        | TTGGATGGATTAGATTGGACTGC | TGGTTTCATTGAAAGCTTCTCTC      |
| ABCG1        | GAGACAGACCTGCTGAATGGG   | CAGTCTCTCTGTATCCCGCC         |
| CD36         | GAGAAGTCTCGGGTACTGCG    | TTGTCTGGATTCTGGAGCGG         |
| SRB1         | GAGCCCCTGAACACGTTCTAT   | CTGTCCGCTGAGAGAGTCCT         |
| G6PC         | GTCCCGGATCTACCTTGCA     | ATTCTGGCCGTTCCACACCAT        |
| PGM2         | CTCGCTCCTCCTGAAGCTGT    | TTGGCCTTGATCTTGTCAGC         |
| PGM3         | AACGGCATAGGAGCCTTGAA    | CAGCACACACAGGTGATTG          |
| GCK          | ACCTTGCCTGGGGAAATAGC    | CATGTGGCTGGACAGTCAGT         |
| PFKM         | ACGGAGCTGAAGGACCAGAC    | GCGTGGTCAGAAGTGTCCAA         |
| PEPCK        | GACAGTGCCCAAGAGACTCC    | TTGGGCAGATCCTGGTTGAC         |
| SDHA         | TGGCGTGGATGTCACTAAGG    | GCACAACCTGATCCTGTCCA         |
| HMGCR        | TGTTTCATGCTCACAGTCGCT   | AGCTCTGCTTGTGCTCTCAG         |
| MVD          | CTGCCTGAGGGAGATTGAC     | TCACCACGAGGATGAGGACT         |
| MVK          | TGCTTCGACCACAGAGCAAT    | TTGGTGCAGACATGGTCCTC         |
| SREBP2       | AGTTGGCAAACCAAAAAACAAG  | GATTAAAGTCTTCAATCTTCAAGTCCAC |
| LDLR         | GCATCACACTAGATATCCCAGT  | GAGTTTGAATCAACCCAATAGA       |
| PCSK9        | CCAACTTTGGACGCTGTGTG    | TGAAGCATGCGCTACAGTCA         |
| VLDLR        | CAGAACAGTGCCGCAACATC    | ACAGTCCAGCTCATCACTGC         |
| ACAT         | CCAGCACACTGAACGATGGA    | AGGTACAGCATATGCAGGCG         |
| LCAT         | TCCCTAAGGCTATGCCCTT     | AGCACAACCAGTTCACCACA         |
| FXR          | TCTTCAGGAGAAGCATTACCAA  | CGCATGTACATATCCATCACAC       |
| HL           | CCTAATCGGCTACAGCCTGG    | GTCATAGTGGGCAATGGGCT         |
| CETP         | AAGCCTTGCGGATTTCCAGA    | CACGACTGATGATCTCGGGG         |
| ACC1         | ACACTGGCTGGCTGGACAG     | CACACAACCTCCAACATGGTG        |
| ACCAA2       | GAAGCTTTACCATGGCGCTG    | TCACGATGGACTGGAAACCG         |
| FAS          | GCAGTCTTGAGTAGCTTTGTGCT | GGGAGCTGTCCAGATTAATACCT      |
| SREBP1C      | GCGGACGCAGTCTGGG        | ATGAGCTGGAGCATGTCTTCAA       |

APOC2

AAGCTCAAGGAACGGAGGAC

GCTGGTCGGTAAAAATGCC

---

**Table. S2 The list of primers used for quantitative real time PCR.**
